# Supplementary material for: Formation of disulphide linkages restricts intramolecular motions of a fluorophore: detection of molecular oxygen in food packaging
Source: Royal Society of Chemistry journal article supplement (doi:10.1039/c8cc10035g), 2019-01-01
Supplement: c8cc10035g1.pdf [file c8cc10035g1.pdf]

# Formation of disulphide linkages restricts intramolecular motions of fluorophore: Detection of molecular oxygen in food package

Sk. Atiur Rahaman, Dipon Kumar Mondal, Subhajit Bandyopadhyay\*

*Department of Chemical Sciences, Indian Institute of Science Education and Research (IISER)  
Kolkata, Mohanpur, Nadia 741246, India*

*E-mail: [sb1@iiserkol.ac.in](mailto:sb1@iiserkol.ac.in)*

---

## CONTENTS

|                                                                                                                                 |         |
|---------------------------------------------------------------------------------------------------------------------------------|---------|
| <b>1. General characterization</b> .....                                                                                        | S2      |
| <b>2. Experimental details</b> .....                                                                                            | S3-S5   |
| <b>2.1 Synthetic procedures</b> .....                                                                                           | S3      |
| <b>2.2 NMR spectra</b> .....                                                                                                    | S4-S5   |
| Figure S5. Absorption and emission spectra of compound <b>1</b> .....                                                           | S6      |
| Figure S6. Emission spectra of compound <b>1</b> in THF-H <sub>2</sub> O mixtures .....                                         | S6      |
| Figure S7. Emission spectra of compound <b>1</b> in THF-H <sub>2</sub> O mixtures at $\lambda_{\text{emission}} = 485$ nm ..... | S7      |
| <b>3. General information of determination of quantum yield</b> .....                                                           | S7      |
| Figure S8. Emission spectra of compound <b>1</b> upon addition with H <sub>2</sub> O <sub>2</sub> .....                         | S8      |
| Figure S9. Emission spectra of compound <b>1</b> upon addition with I <sub>2</sub> .....                                        | S8      |
| Figure S10. Emission spectra of compound <b>1'</b> upon addition with NaBH <sub>4</sub> .....                                   | S9      |
| Figure S11. Relative fluorescence intensity vs. partial pressure of oxygen .....                                                | S9      |
| <b>4. General information of fluorescence lifetime analyses</b> .....                                                           | S10     |
| Figure S12. Chemical shift of <sup>13</sup> C NMR signals of compound <b>1</b> and polymer <b>1'</b> .....                      | S10     |
| <b>5. General information of Advanced Polymer Chromatography (APC)</b> .....                                                    | S10     |
| Figure S13. SEM image .....                                                                                                     | S11     |
| Figure S14. Paper strip study .....                                                                                             | S11     |
| <b>6. A limit of detection</b> .....                                                                                            | S12     |
| Figure S15. Detection limit calculation pot .....                                                                               | S12     |
| <b>7. Toxicity studies with mammalian cells: J774A.1</b> .....                                                                  | S12     |
| Figure S16. Relative cell viability analysis .....                                                                              | S13     |
| S17. SCXRD structures of compound <b>2</b> .....                                                                                | S13     |
| <b>Crystallographic Details</b> .....                                                                                           | S13     |
| <b>Table S2</b> . Crystallographic parameters.....                                                                              | S14     |
| <b>Table S3 and Table S4</b> . Bond Lengths (Å) and Bond Angles (°) for <b>2</b> .....                                          | S15-S20 |

## 1. General characterization

All reactants and reagents were commercially available and were used without further purification unless otherwise indicated. Solvents used were purified and dried by standard methods. The structures of the compounds were determined by 1D and 2D NMR spectrometry and other spectroscopic techniques.  $^1\text{H}$  and  $^{13}\text{C}$  NMR spectra were recorded with 400 MHz JEOL and 500 MHz Bruker instruments. Chemical shifts are reported as  $\delta$  values relative to an internal reference of tetramethylsilane (TMS) for  $^1\text{H}$  NMR and the solvent peak in the case of  $^{13}\text{C}$  NMR. The spectroscopic-grade solvents for the spectroscopic experiments were free from any fluorescent impurity. Double-distilled water was used for the spectroscopy experiments. UV-vis spectra were recorded with a Cary 60 UV-vis spectrophotometer. Fluorescence measurements were carried out with a JASCO FP-8500 Fluorescence Spectrometer (Xe-150 W, 200 - 750 nm). Fluorescence lifetime measurements were carried out by the method of time-correlated single-photon counting (TCSPC) using a picoseconds spectrofluorimeter from Horiba JobinYvon IBH equipped with a FluoroHub single photon counting controller, Fluoro3PS precision photomultiplier power supply, and FC-MCP-50SC MCP-PMT detection unit. The 402 nm laser head was used as the excitation source. Molecular weights and molecular weight distributions (dispersity ( $\text{Đ}$ )) of polymers were determined by Waters ACQUITY Advanced Polymer Chromatography (APC). MS data were obtained from an Acquity ultraperformance liquid chromatography (LC)-MS. Reactions were monitored by thin-layer chromatography (TLC) using Merck plates (TLC Silica Gel 60 F254). Developed TLC plates were visualized with UV light (254 nm). Silica gel (100–200 mesh, Merck) was used for column chromatography. Yields refer to the chromatographically and spectroscopically pure compounds.

## 2. Experimental details

### 2.1 Synthetic procedures

**Scheme S1.** Chemical structures and synthetic route .

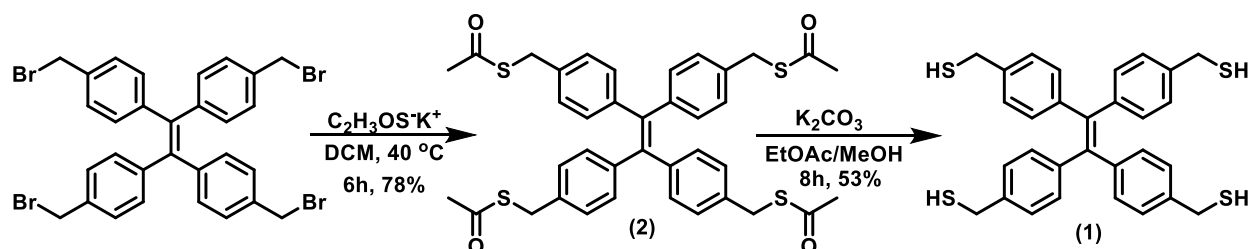

The starting material 1,1,2,2-tetrakis(4-(bromomethyl)phenyl)ethene was prepared following the literature.<sup>1</sup>

#### **S,S',S'',S'''-((ethene-1,1,2,2-tetrayltetrakis(benzene-4,1-diyl))tetrakis(methylene))tetraethenethioate (2)**

Potassium thioacetate (0.132 g, 0.5822 mmol) and 1,1,2,2-tetrakis(4-(bromomethyl)phenyl)ethene (0.1 g, 0.142 mmol) were dissolved in 15 mL of dichloromethane and was subsequently stirred for 6h at 40 °C. The volatiles were removed by rotary-evaporation at 35 °C. The crude product was washed with water and  $\text{NaHCO}_3$  saturated solution and redissolved in dichloromethane, then, dried over sodium sulphate. The column chromatography performed using ethyl acetate/hexane (30:70, v/v) afforded **2** (0.076 g, 78%) as a white solid. mp 356–358 °C.  $^1\text{H}$  NMR (500 MHz,  $\text{CDCl}_3$ )  $\delta$  2.34 (s, 3H), 4.03 (s, 2H), 6.89 (d, 2H,  $J = 7.8$  Hz), 6.99 (d, 2H,  $J = 8.1$  Hz).  $^{13}\text{C}$  NMR (125 MHz,  $\text{CDCl}_3$ )  $\delta$  30.3, 33.2, 128.1, 131.4, 135.5, 140.2, 141.4, 198.1.

#### **(Ethene-1,1,2,2-tetrayltetrakis(benzene-4,1-diyl))tetramethanethiol (1)**

$\text{K}_2\text{CO}_3$  (0.097 g, 0.701 mmol) was added to compound **2** (0.1 g, 0.146 mmol) in 1:1 EtOAc/MeOH (6 mL) and the mixture was stirred for 8 h at 25 °C. After concentration, the residue was diluted with dichloromethane (10 mL) and  $\text{H}_2\text{O}$  (5 mL). The organic layer was dried over sodium sulphate. Column chromatography performed using ethyl acetate/hexane (20:80, v/v) afforded **1** (0.04 g, 53%) as a yellow solid. mp 345–347 °C.  $^1\text{H}$  NMR (400 MHz,  $\text{CDCl}_3$ )  $\delta$  1.71 (t, 4H,  $J = 7.64$  Hz), 3.67 (d, 8H,  $J = 7.64$  Hz), 6.95 (d, 8H,  $J = 8.4$  Hz), 7.06 (d, 8H,  $J = 8.4$  Hz).  $^{13}\text{C}$  NMR (125 MHz,  $\text{CDCl}_3$ )  $\delta$  33.3, 128.6, 131.6, 136.2, 140.6, 143.2. ESI-MS ( $m/z$ ): Calcd. for  $\text{C}_{30}\text{H}_{28}\text{S}_4$  [ $\text{M}+\text{NH}_4$ ] $^+$  534.1418, found 534.1417. Anal. Calcd. for  $\text{C}_{30}\text{H}_{28}\text{S}_4$ : C, 69.72; H, 5.46; S, 24.81, found: C, 69.68; H, 5.43; S, 24.78.

## 2.2 NMR spectra

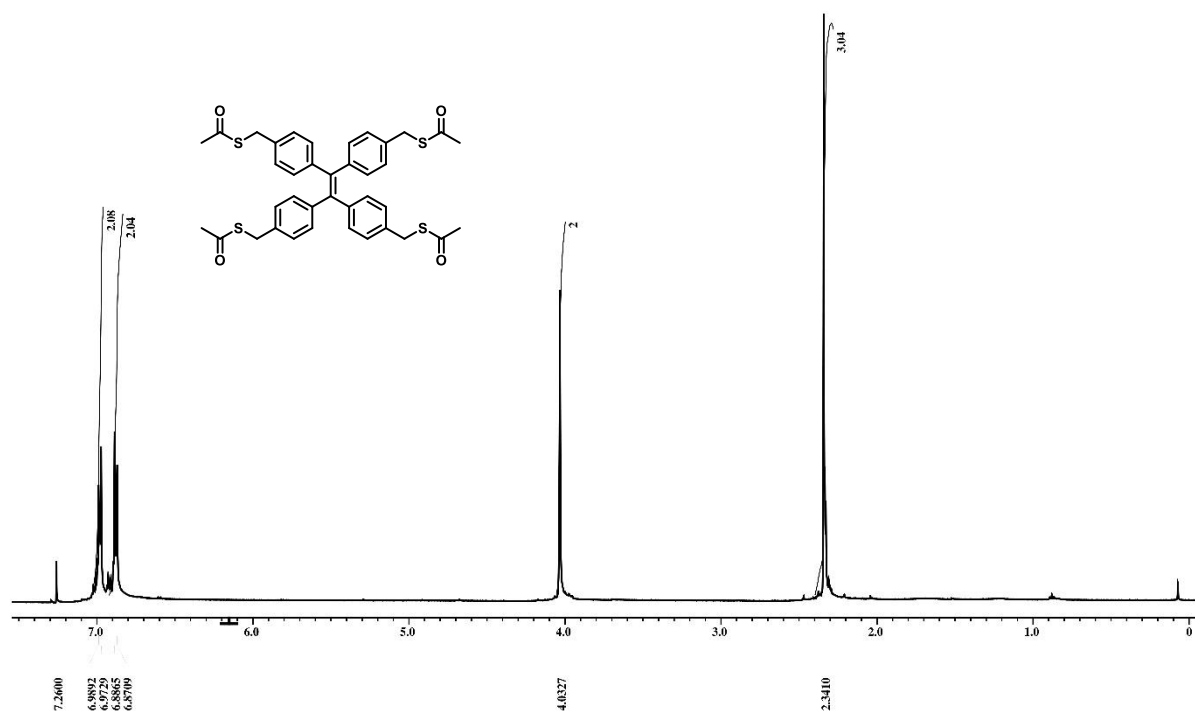

**Figure S1.** <sup>1</sup>H-NMR spectrum of compound 2

GROUP SB  
SB-AR-8851 in CDCl<sub>3</sub>

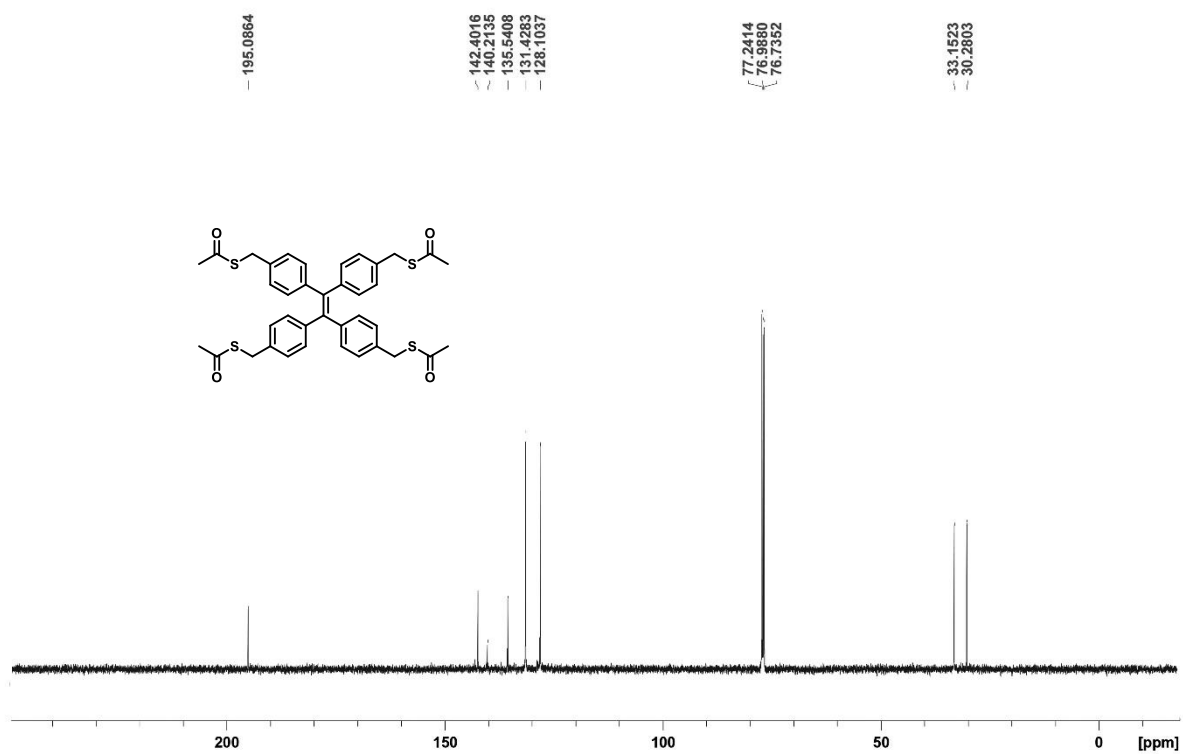

**Figure S2.**  $^{13}\text{C}$ -NMR spectrum of compound **2**

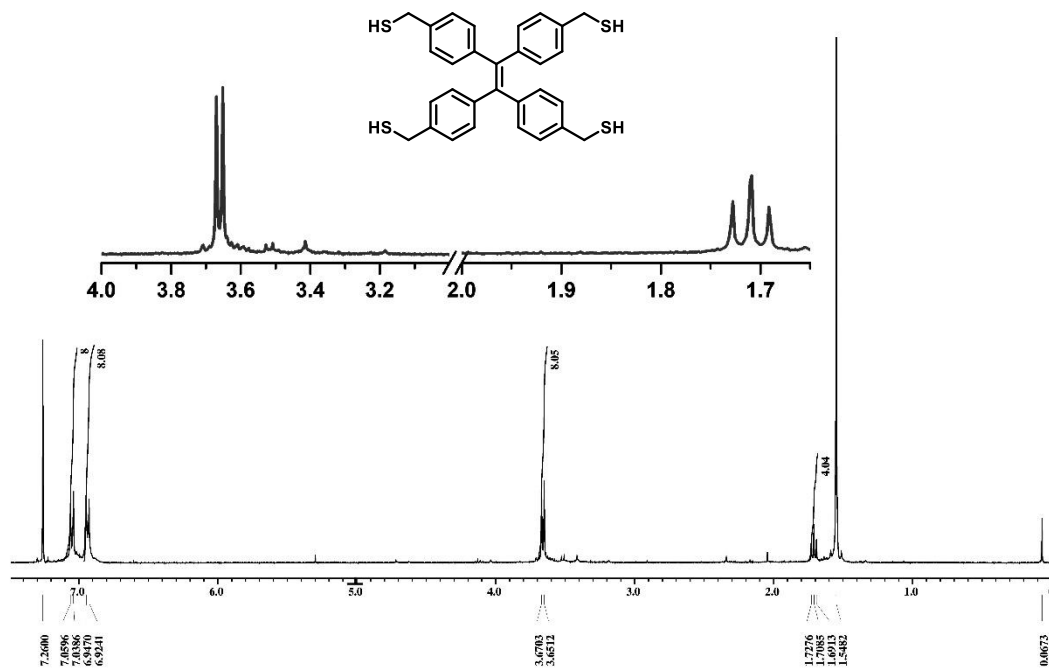

**Figure S3.**  $^1\text{H}$ -NMR spectrum of compound **1**

GROUP SB  
SB-AR-9851 in CDCl<sub>3</sub>

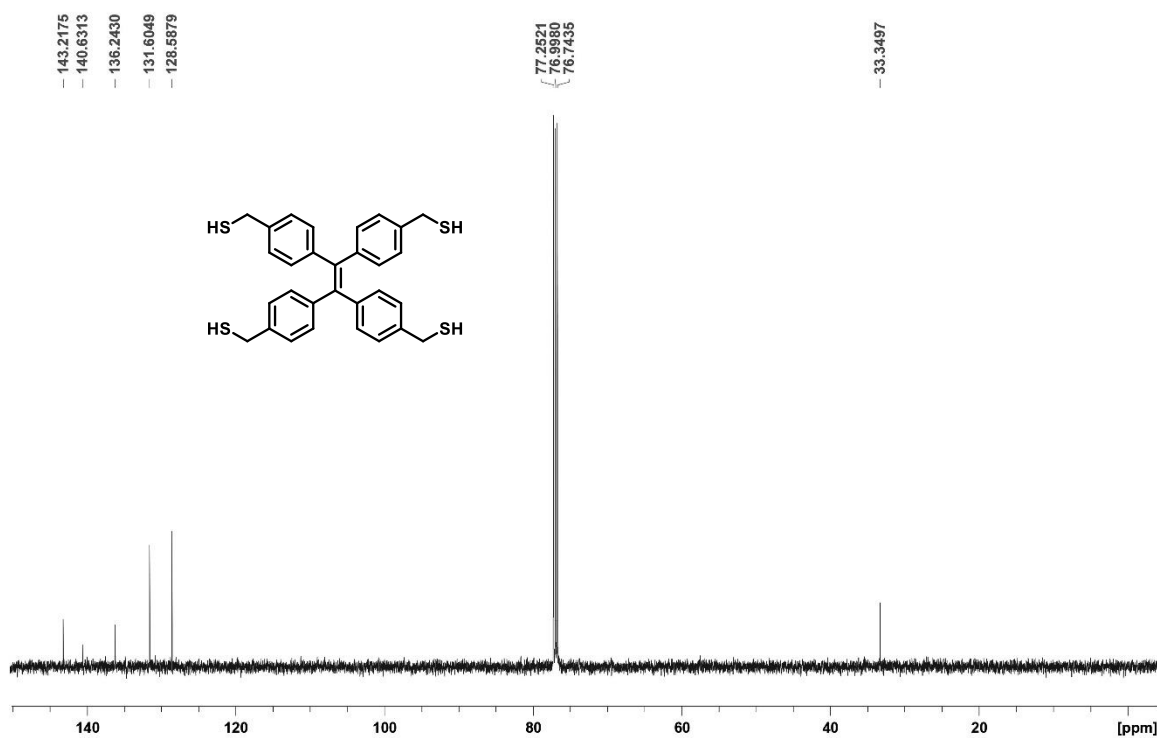

**Figure S4.**  $^{13}\text{C}$ -NMR spectrum of compound **1**

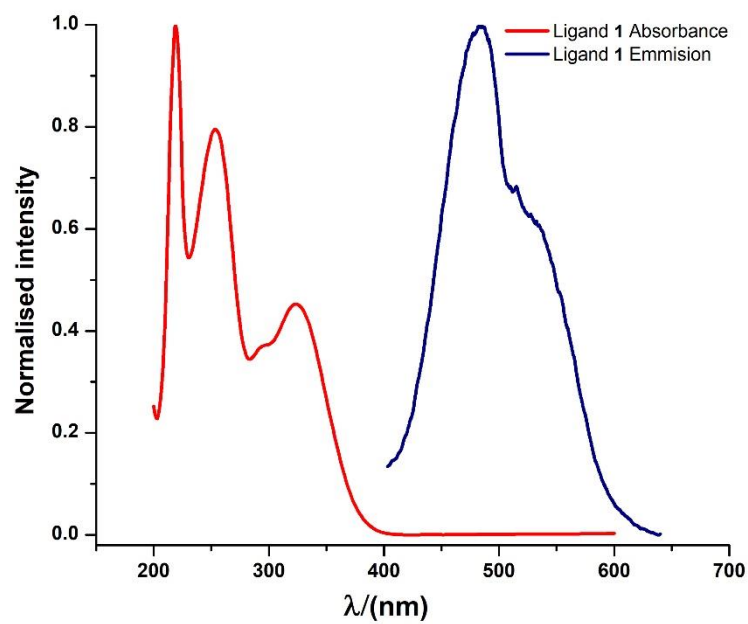

**Figure S5.** Electronic absorption and emission spectra ( $\lambda_{\text{ex}} = 320$  nm, excitation and emission slit width 5/5) of compound **1** (10  $\mu\text{M}$ ) in THF media at 25  $^{\circ}\text{C}$ .

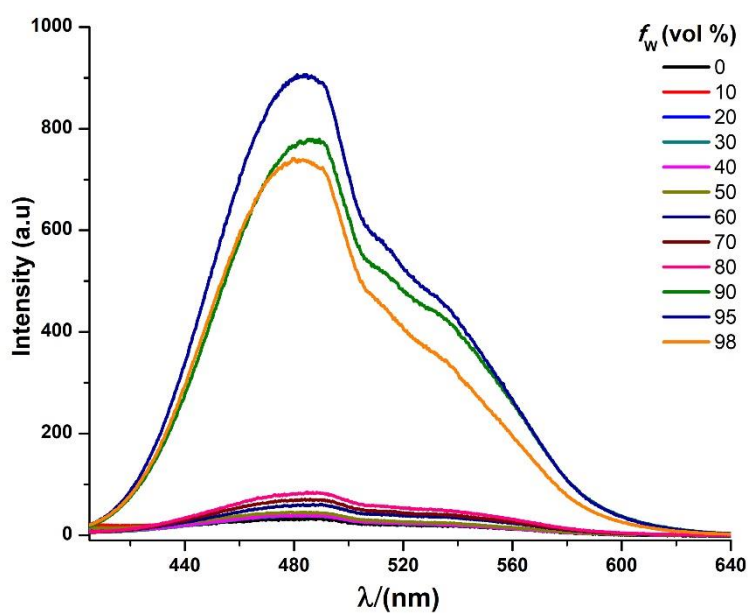

**Figure S6.** Emission spectra of compound **1** in THF–H<sub>2</sub>O mixtures with different water fractions ( $f_w$ ).

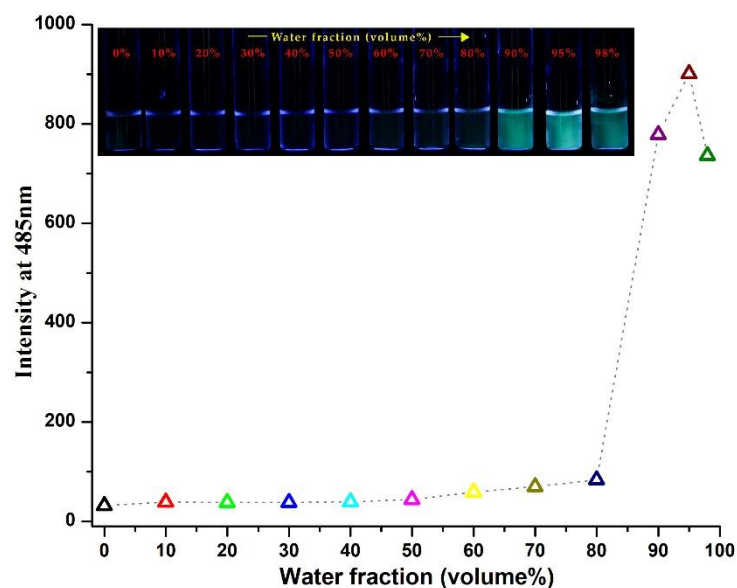

**Figure S7.** Plot of fluorescence intensity ( $\lambda_{\text{emission}} = 485 \text{ nm}$ ) of **1** versus composition of THF/water mixture. Insert: Photographs of the solutions or suspensions of the molecules of **1** in THF/water mixtures with different volumetric fractions of water ( $f_w$ , vol%) under 366 nm light.

### 3. Determination of quantum yield<sup>2</sup>

The quantum yields ( $\phi$ ) of the compound **1** and polymer were calculated by comparing their integrated fluorescence intensities (excitation at 350 nm) and the absorbance values at 350 nm with those of quinine sulfate. Quinine sulfate ( $\phi_s = 0.54$ ) was dissolved in 0.1M  $\text{H}_2\text{SO}_4$  (refractive index: 1.33) and the compound **1** and polymer were dissolved in THF (refractive index: 1.407). The integrated fluorescence intensity is the area under the fluorescence curve in the wavelength range from 365 to 680 nm.

Relative quantum yield was calculated from the equation below:

$$\phi_F = \phi_S \cdot \frac{A_S}{A_U} \cdot \frac{F_U}{F_S} \cdot \frac{\eta_U^2}{\eta_S^2}$$

Where  $\phi_s$  is the quantum yield of the standard, A is the absorbance at the excitation wavelength (subscript S for standard\* and U for unknown), F is the area under the emission spectra and  $\eta$  is the refractive index of the solvent.

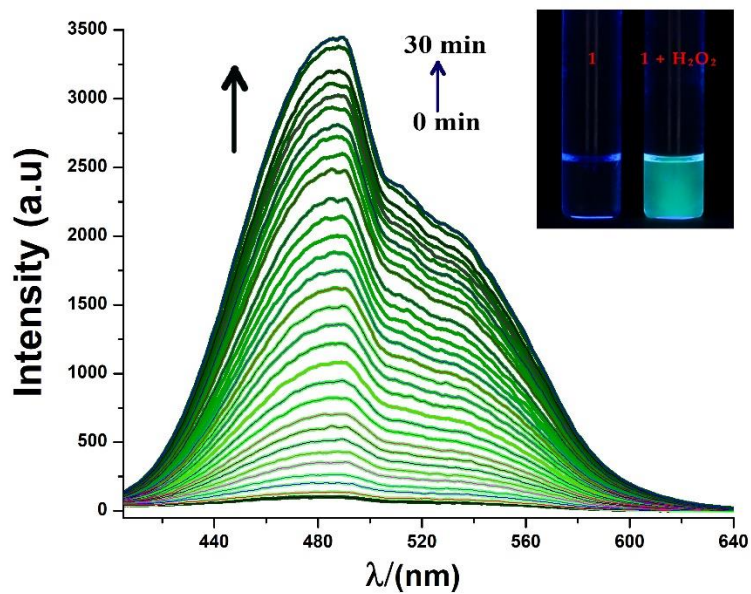

**Figure S8.** Changes in the emission spectra of compound **1** (10  $\mu\text{M}$ ) ( $\lambda_{\text{ex}}$ : 320 nm, slit: 5/5); Insert: visual change under 366 nm light in THF media at 25  $^{\circ}\text{C}$  upon addition with  $\text{H}_2\text{O}_2$  (10  $\mu\text{M}$ ).

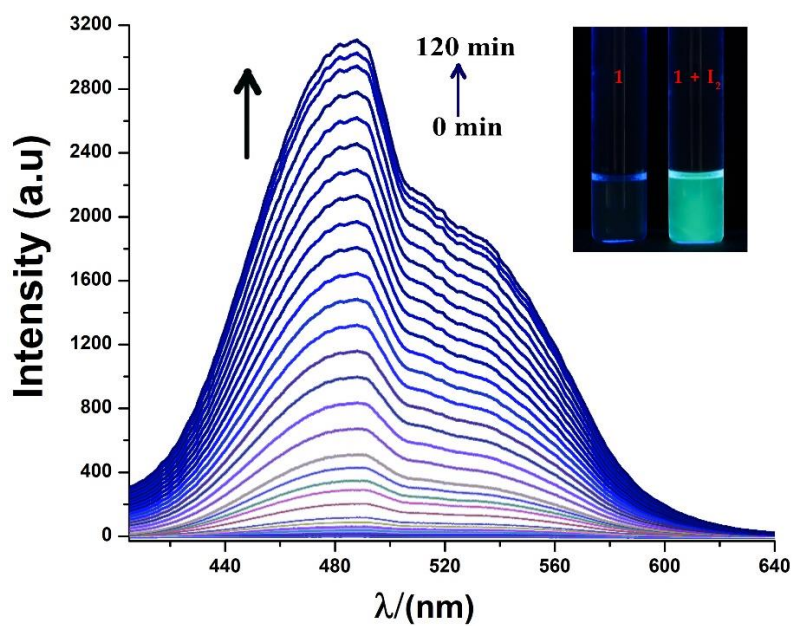

**Figure S9.** Changes in the emission spectra of compound **1** (10  $\mu\text{M}$ ) ( $\lambda_{\text{ex}}$ : 320 nm, slit: 5/5); Insert: visual change under 366 nm light in THF media at 25  $^{\circ}\text{C}$  upon addition with  $\text{I}_2$  (10  $\mu\text{M}$ ).



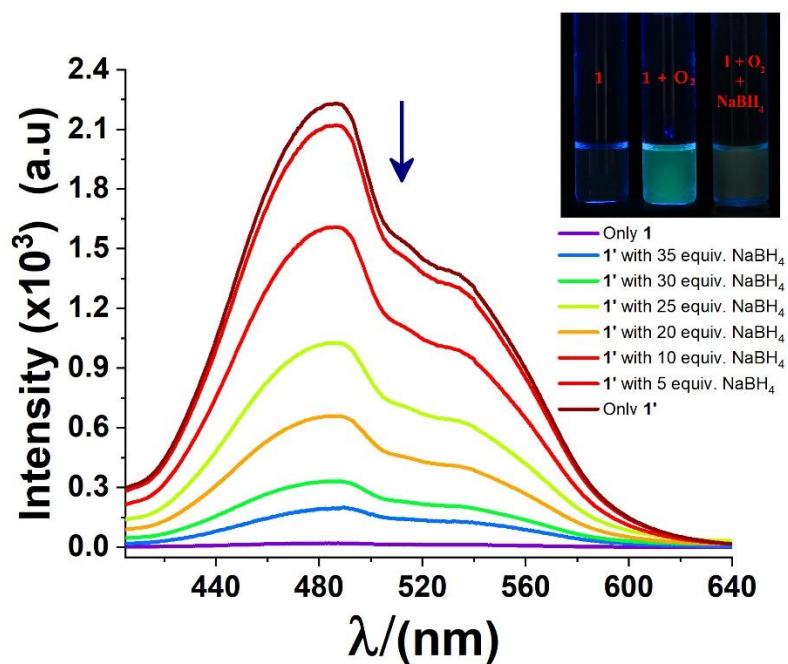

**Figure S10.** Changes in the emission spectra of polymer **1'** (10  $\mu\text{M}$ ) ( $\lambda_{\text{ex}}$ : 320 nm, slit: 5/5) studies for establishing the reversibility in binding of **1'** to  $\text{NaBH}_4$  in THF media upon addition of 0-35 equivalents of  $\text{BH}_4^-$  at 25  $^\circ\text{C}$ ; Insert: visual changes under 366 nm UV light in THF media at 25  $^\circ\text{C}$  upon addition with  $\text{BH}_4^-$ .

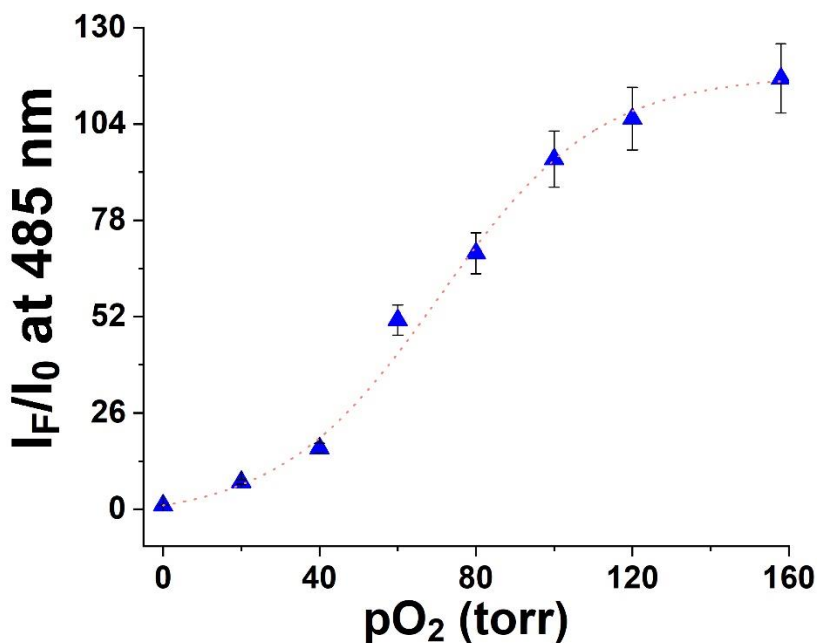

**Figure S11.** Relative fluorescence intensity vs. partial pressure of oxygen for compound **1** (10  $\mu\text{M}$ ) in THF media at 25  $^\circ\text{C}$  after 300 min.

#### 4. Fluorescence lifetime analyses

The data in Fig. 3B was fitted with a biexponential decay equation:

$$I = \alpha_1 e^{-\frac{t}{\tau_1}} + \alpha_2 e^{-\frac{t}{\tau_2}}$$

The average lifetime  $\langle\tau\rangle$  is given by:

$$\langle\tau\rangle = \frac{\alpha_1 \tau_1^2 + \alpha_2 \tau_2^2}{\alpha_1 \tau_1 + \alpha_2 \tau_2}$$

The TCSPC data has been presented in **Fig. 3B** (Main text).

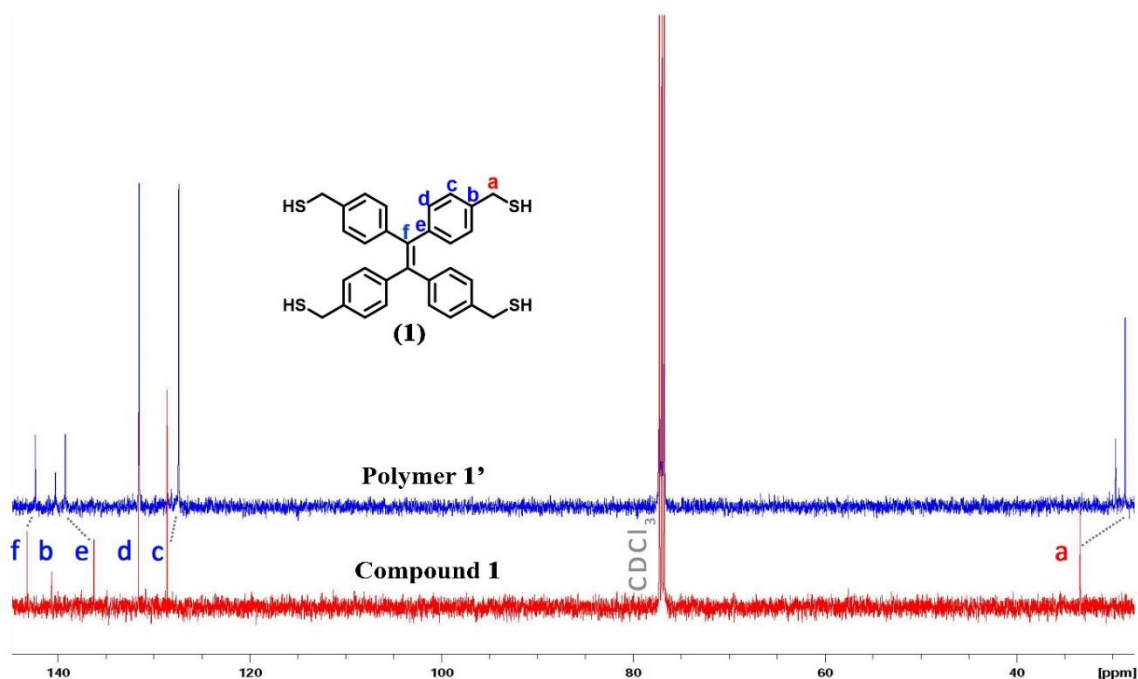

**Figure S12.** . The shift in the  $^{13}\text{C}$  NMR signals of compound **1** upon bubbling with air.

**Table S1** Delta shift value of  $^{13}\text{C}$  NMR for compound **1** and polymer **1'**

| Carbon | $(\delta_{\text{final}} - \delta_{\text{initial}}) = \Delta\delta$ | Remarks   |
|--------|--------------------------------------------------------------------|-----------|
| a      | 4.6                                                                | Upfield   |
| b      | 3                                                                  | Upfield   |
| c      | 1.2                                                                | Upfield   |
| d      | 0.1                                                                | Upfield   |
| e      | -3                                                                 | Downfield |
| f      | 0.9                                                                | Upfield   |

#### 5. Advanced Polymer Chromatography (APC)

Molecular weights and molecular weight distributions (dispersity ( $\bar{D}$ )) of polymers were determined by Waters ACQUITY Advanced Polymer Chromatography (APC). The instrument contains a 1500 series HPLC pump, an ACQUITY<sup>TM</sup> refractive index (RI) detector, one ACQUITY APCTM XT

2002.5  $\mu\text{m}$  ( $4.6 \times 7.5$  mm) column in THF at 45  $^{\circ}\text{C}$  at 0.25 mL/min flow rate. Poly(methyl methacrylate) (PMMA) standards were used to calibrate the instrument.

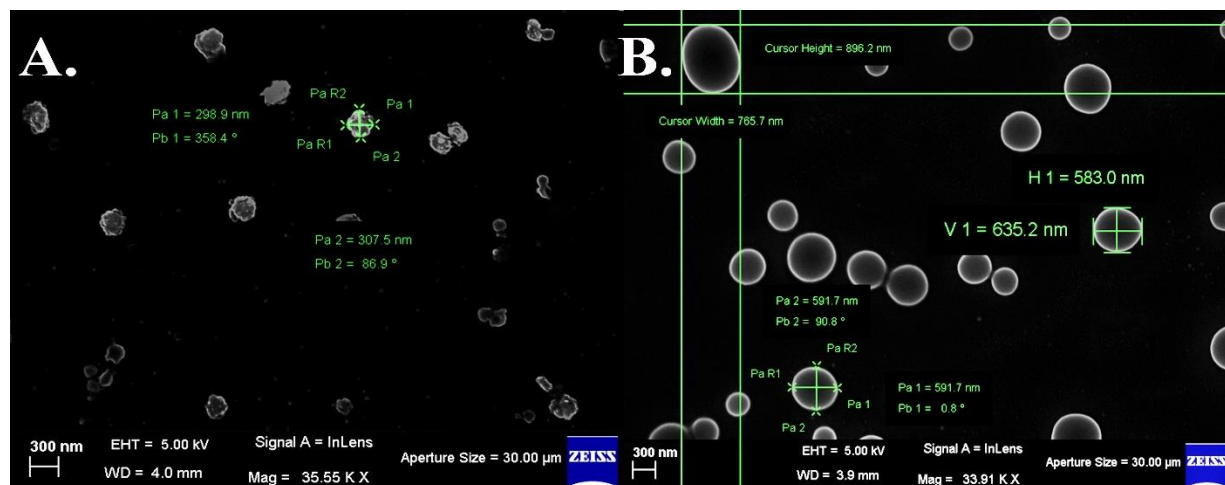

**Figure S13.** SEM image of a dried sample of compound **1** (A) and polymer **1'** (B).

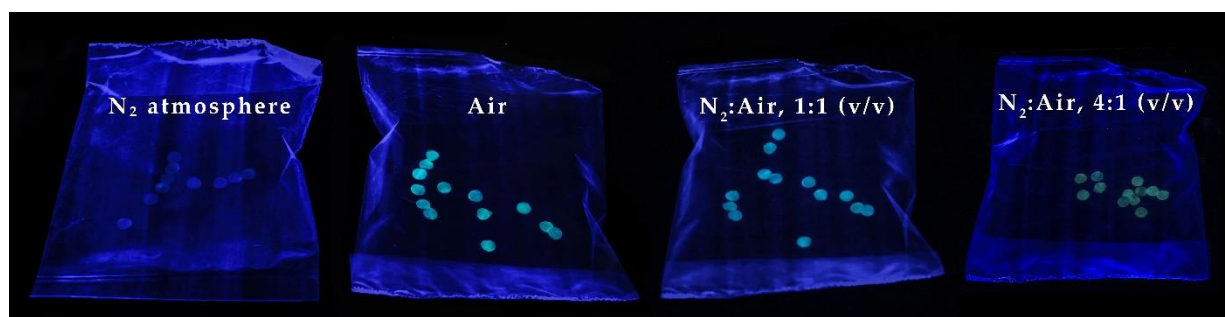

**Figure S14.** The photographs of the paper-dots of **1** (see the main text) in sealed plastic bags under various ratios of N<sub>2</sub> gas and atmospheric air after 2 days.

## 6. The limit of detection of oxygen in 24 h time scale upon exposure to O<sub>2</sub>

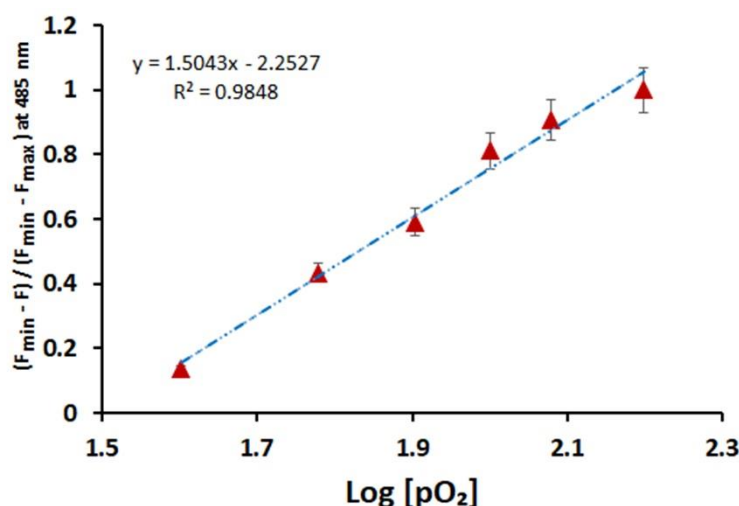

**Figure S15.** A linear curve was obtained from these normalized fluorescence intensity data. The intercept on the x-axis was considered as the detection limit. Thus the value obtained for the partial pressure of oxygen was found to be 30.8 torr.

## 7. Toxicity studies with mammalian cells: J774A.1

J774A.1 (murine macrophage cell line from the National Centre for Cell Science, Pune, India) cells were grown in Dulbecco's modified Eagle's medium (Gibco) supplemented with 2 mM L-glutamine, 100 µg/ml penicillin, 100 µg/ml streptomycin, and 10% heat-inactivated fetal bovine albumin (Gibco) at 37 °C in a humidified atmosphere containing 5% CO<sub>2</sub>.

### 7.1 Analysis of cell viability after treatment with probe 1

The J774A.1 cells were treated with probe **1** at different concentrations (0.1 µM to 100 µM) as indicated in the X-axis of Figure S16. Each of the sets of the cell line was treated with the various concentrations of **1** for 24 hours. Control experiments under identical conditions in the absence of probe **1** was also studied. Equal amount of the cells from the control, and the sample treated with probe **1** were incubated with 0.5 mg/ml MTT [3-(4, 5-dimethylthiazol-2-yl)-2,5-diphenyl tetrazolium bromide] (Invitrogen) for 2 h to allow formation of purple formazan. Then the cells were washed with phosphate-buffered saline (PBS) and harvested by centrifugation, and the cell pellet was dissolved in DMSO. The optical density (OD) of the solution was measured on a microplate reader (SpectraMax M2e; Molecular Devices) at a wavelength of 595 nm. Since the

OD of formazan produced by the action of mitochondrial dehydrogenases of metabolically active cells correlates with the number of viable cells, the percentage of viability upon drug treatment was calculated using the formula ( $OD_{\text{treated}}/OD_{\text{control}} \times 100$ ).

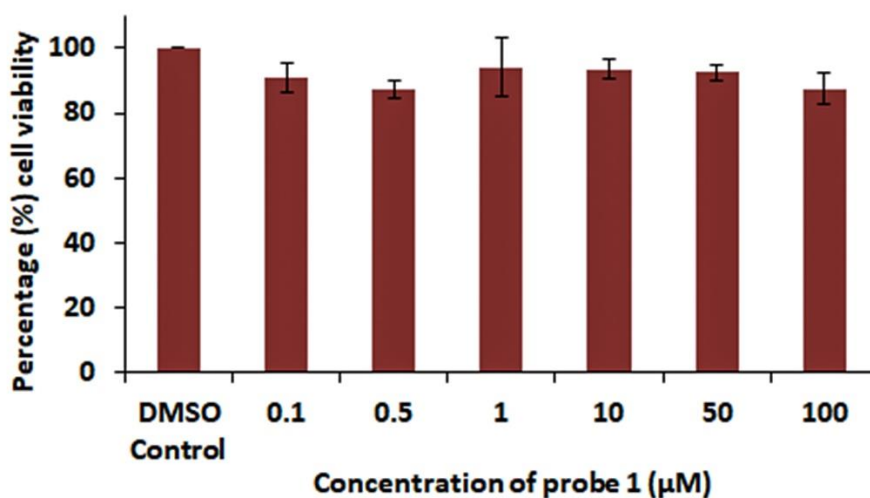

**Figure S16.** Relative cell viability analysis of J774A.1 murine macrophage cell line in different treatments after incubated for 24 h (errors were estimated from the std.dev. of three independent trials).

## 8. SCXRD structure

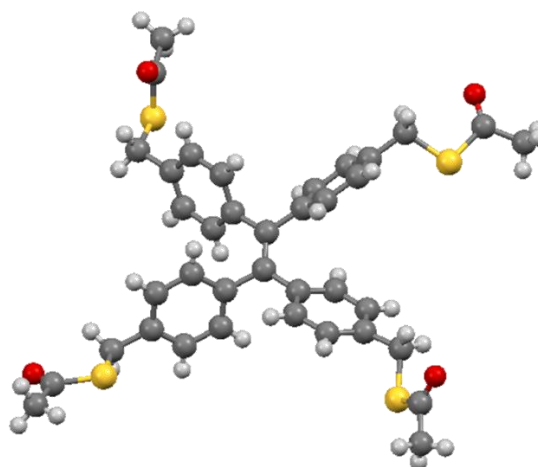

**Figure S17.** SCXRD structures of compound 2.

### Crystallographic Details

Single crystals of  $C_{38}H_{36}O_4S_4$  (CCDC Number 1879842) was obtained by slow diffusion of  $CH_2Cl_2$ : hexane (1:1, v/v) solution. Suitable crystals for sample was selected on a SuperNova, Dual, Cu at zero, Eos diffractometer using graphite monochromatic Mo  $K\alpha$  radiation ( $\lambda = 0.71073 \text{ \AA}$ ). The crystals were kept at 100 K respectively during data collection. Using Olex<sup>3</sup> the structures were

solved with the Super flip<sup>4</sup> structure solution program using Charge Flipping and refined with the ShelXL<sup>5</sup> refinement package using Least Squares minimisation. All hydrogen atoms were added according to the riding model. Crystallographic parameters for compound **1** is given in the **Table S1**. Selected bond lengths and bond angles of compound **1** are given in the **Table S2** and **Table S3**.

**Table S2.** Crystallographic parameters and structure refinements for **1**.

|                                                                                                |                                                                                           |
|------------------------------------------------------------------------------------------------|-------------------------------------------------------------------------------------------|
| Chemical formula                                                                               | C <sub>38</sub> H <sub>36</sub> O <sub>4</sub> S <sub>4</sub>                             |
| $M_r$                                                                                          | 684.91                                                                                    |
| Crystal system, space group                                                                    | Monoclinic, $P2_1/n$                                                                      |
| Temperature (K)                                                                                | 100                                                                                       |
| $a, b, c$ (Å)                                                                                  | 11.2605 (7), 28.0222 (14), 11.3063 (5)                                                    |
| $\beta$ (°)                                                                                    | 102.040 (5)                                                                               |
| $V$ (Å <sup>3</sup> )                                                                          | 3489.2 (3)                                                                                |
| $Z$                                                                                            | 4                                                                                         |
| Radiation type                                                                                 | Mo $K\alpha$                                                                              |
| $\mu$ (mm <sup>-1</sup> )                                                                      | 0.31                                                                                      |
| Crystal size (mm)                                                                              | 0.36 × 0.33 × 0.26                                                                        |
| Data collection Diffractometer                                                                 | SuperNova, Dual, Cu at zero, Eos                                                          |
| $T_{\min}$ : $T_{\max}$                                                                        | 0.711, 1.000                                                                              |
| No. of measured, independent and<br>observed [ $I > 2\sigma(I)$ ] reflections $R_{\text{int}}$ | 12229, 5886, 4863<br>0.042                                                                |
| $(\sin \theta/\lambda)_{\text{max}}$ (Å <sup>-1</sup> )                                        | 0.595                                                                                     |
| Refinement                                                                                     |                                                                                           |
| $R[F^2 > 2\sigma(F^2)]$ , $wR(F^2)$ , $S$                                                      | 0.108, 0.309, 1.06                                                                        |
| No. of reflections                                                                             | 5886                                                                                      |
| No. of parameters                                                                              | 419                                                                                       |
| H-atom treatment                                                                               | H-atom parameters constrained                                                             |
|                                                                                                | $w = 1/[\sigma^2(F_o^2) + (0.1629P)^2 + 14.4689P]$<br>o<br>where $P = (F_o^2 + 2F_c^2)/3$ |
| $\Delta\rho_{\text{max}}$ , $\Delta\rho_{\text{min}}$ (e Å <sup>-3</sup> )                     | 2.70, -1.01                                                                               |

**Table S3.** Bond Lengths (Å) for **2**.

| Number | Atom1 | Atom2 | Length   |
|--------|-------|-------|----------|
| 1      | S001  | C00M  | 1.770(6) |
| 2      | S001  | C011  | 1.824(6) |
| 3      | S002  | C012  | 1.813(6) |
| 4      | S002  | C013  | 1.777(7) |
| 5      | S003  | C014  | 1.849(7) |
| 6      | S003  | C018  | 1.767(9) |
| 7      | S004  | C015  | 1.760(9) |
| 8      | S004  | C019  | 1.769(9) |
| 9      | O005  | C00M  | 1.194(7) |
| 10     | O006  | C013  | 1.156(9) |
| 11     | O007  | C015  | 1.17(1)  |
| 12     | C008  | C00B  | 1.483(7) |
| 13     | C008  | C00C  | 1.384(7) |
| 14     | C008  | C00D  | 1.398(8) |
| 15     | C009  | C00A  | 1.409(8) |
| 16     | C009  | C00B  | 1.493(7) |
| 17     | C009  | C00K  | 1.379(8) |
| 18     | C00A  | H00A  | 0.93     |
| 19     | C00A  | C00J  | 1.383(8) |
| 20     | C00B  | C00G  | 1.371(7) |
| 21     | C00C  | H00C  | 0.929    |
| 22     | C00C  | C00N  | 1.384(7) |
| 23     | C00D  | H00D  | 0.93     |
| 24     | C00D  | C00U  | 1.376(8) |
| 25     | C00E  | H00E  | 0.93     |
| 26     | C00E  | C00F  | 1.405(7) |
| 27     | C00E  | C00S  | 1.380(8) |
| 28     | C00F  | C00G  | 1.478(8) |
| 29     | C00F  | C00T  | 1.398(8) |
| 30     | C00G  | C00H  | 1.501(7) |
| 31     | C00H  | C00I  | 1.398(8) |
| 32     | C00H  | C00P  | 1.397(9) |
| 33     | C00I  | H00I  | 0.93     |
| 34     | C00I  | C00Q  | 1.394(8) |
| 35     | C00J  | H00J  | 0.93     |
| 36     | C00J  | C00O  | 1.38(1)  |
| 37     | C00K  | H00K  | 0.93     |
| 38     | C00K  | C00R  | 1.387(8) |
| 39     | C00L  | C00N  | 1.382(9) |

|    |      |      |          |
|----|------|------|----------|
| 40 | C00L | C00U | 1.405(9) |
| 41 | C00L | C012 | 1.518(8) |
| 42 | C00M | C00Y | 1.504(8) |
| 43 | C00N | H00N | 0.93     |
| 44 | C00O | C00R | 1.384(9) |
| 45 | C00O | C014 | 1.499(8) |
| 46 | C00P | H00P | 0.931    |
| 47 | C00P | C00W | 1.394(8) |
| 48 | C00Q | H00Q | 0.93     |
| 49 | C00Q | C00V | 1.39(1)  |
| 50 | C00R | H00R | 0.929    |
| 51 | C00S | H00S | 0.929    |
| 52 | C00S | C00Z | 1.403(8) |
| 53 | C00T | H00T | 0.929    |
| 54 | C00T | C010 | 1.378(8) |
| 55 | C00U | H00U | 0.929    |
| 56 | C00V | C00W | 1.380(8) |
| 57 | C00V | C011 | 1.534(9) |
| 58 | C00W | H00W | 0.929    |
| 59 | O00X | C018 | 1.13(1)  |
| 60 | C00Y | H00B | 0.961    |
| 61 | C00Y | H00F | 0.96     |
| 62 | C00Y | H00G | 0.959    |
| 63 | C00Z | C010 | 1.389(8) |
| 64 | C00Z | C019 | 1.52(1)  |
| 65 | C010 | H010 | 0.93     |
| 66 | C011 | H01A | 0.97     |
| 67 | C011 | H01B | 0.97     |
| 68 | C012 | H01C | 0.971    |
| 69 | C012 | H01D | 0.969    |
| 70 | C013 | C01A | 1.48(1)  |
| 71 | C014 | H01E | 0.97     |
| 72 | C014 | H01F | 0.97     |
| 73 | C015 | C017 | 1.47(1)  |
| 74 | C016 | H01G | 0.961    |
| 75 | C016 | H01H | 0.96     |
| 76 | C016 | H01I | 0.96     |
| 77 | C016 | C018 | 1.51(1)  |
| 78 | C017 | H01J | 0.96     |
| 79 | C017 | H01K | 0.96     |
| 80 | C017 | H01L | 0.96     |
| 81 | C019 | H01M | 0.97     |
| 82 | C019 | H01N | 0.97     |
| 83 | C01A | H01O | 0.96     |



|    |      |      |      |
|----|------|------|------|
| 84 | C01A | H01P | 0.96 |
| 85 | C01A | H01Q | 0.96 |

**Table S4.** Bond Angles (°) for **2**.

| Number | Atom1 | Atom2 | Atom3 | Angle    |
|--------|-------|-------|-------|----------|
| 1      | C00M  | S001  | C011  | 100.0(3) |
| 2      | C012  | S002  | C013  | 101.4(3) |
| 3      | C014  | S003  | C018  | 98.3(4)  |
| 4      | C015  | S004  | C019  | 103.5(4) |
| 5      | C00B  | C008  | C00C  | 118.7(5) |
| 6      | C00B  | C008  | C00D  | 124.0(5) |
| 7      | C00C  | C008  | C00D  | 117.2(5) |
| 8      | C00A  | C009  | C00B  | 118.5(5) |
| 9      | C00A  | C009  | C00K  | 118.4(5) |
| 10     | C00B  | C009  | C00K  | 123.1(5) |
| 11     | C009  | C00A  | H00A  | 120      |
| 12     | C009  | C00A  | C00J  | 120.0(5) |
| 13     | H00A  | C00A  | C00J  | 120      |
| 14     | C008  | C00B  | C009  | 113.2(4) |
| 15     | C008  | C00B  | C00G  | 124.3(5) |
| 16     | C009  | C00B  | C00G  | 122.5(5) |
| 17     | C008  | C00C  | H00C  | 118.9    |
| 18     | C008  | C00C  | C00N  | 122.1(5) |
| 19     | H00C  | C00C  | C00N  | 119      |
| 20     | C008  | C00D  | H00D  | 119.1    |
| 21     | C008  | C00D  | C00U  | 121.7(5) |
| 22     | H00D  | C00D  | C00U  | 119.2    |
| 23     | H00E  | C00E  | C00F  | 119.1    |
| 24     | H00E  | C00E  | C00S  | 118.9    |
| 25     | C00F  | C00E  | C00S  | 121.9(5) |
| 26     | C00E  | C00F  | C00G  | 122.2(5) |
| 27     | C00E  | C00F  | C00T  | 116.4(5) |
| 28     | C00G  | C00F  | C00T  | 121.4(5) |
| 29     | C00B  | C00G  | C00F  | 123.4(5) |
| 30     | C00B  | C00G  | C00H  | 119.9(5) |
| 31     | C00F  | C00G  | C00H  | 116.6(4) |
| 32     | C00G  | C00H  | C00I  | 122.4(5) |
| 33     | C00G  | C00H  | C00P  | 120.0(5) |
| 34     | C00I  | C00H  | C00P  | 117.6(5) |
| 35     | C00H  | C00I  | H00I  | 119.6    |
| 36     | C00H  | C00I  | C00Q  | 120.8(5) |

|    |      |      |      |          |
|----|------|------|------|----------|
| 37 | H00I | C00I | C00Q | 119.5    |
| 38 | C00A | C00J | H00J | 119.3    |
| 39 | C00A | C00J | C00O | 121.5(5) |
| 40 | H00J | C00J | C00O | 119.2    |
| 41 | C009 | C00K | H00K | 119.7    |
| 42 | C009 | C00K | C00R | 120.5(5) |
| 43 | H00K | C00K | C00R | 119.7    |
| 44 | C00N | C00L | C00U | 118.8(6) |
| 45 | C00N | C00L | C012 | 120.6(5) |
| 46 | C00U | C00L | C012 | 120.5(5) |
| 47 | S001 | C00M | O005 | 122.1(5) |
| 48 | S001 | C00M | C00Y | 113.7(4) |
| 49 | O005 | C00M | C00Y | 124.2(5) |
| 50 | C00C | C00N | C00L | 120.2(5) |
| 51 | C00C | C00N | H00N | 119.9    |
| 52 | C00L | C00N | H00N | 119.9    |
| 53 | C00J | C00O | C00R | 118.2(6) |
| 54 | C00J | C00O | C014 | 121.2(6) |
| 55 | C00R | C00O | C014 | 120.6(6) |
| 56 | C00H | C00P | H00P | 119.5    |
| 57 | C00H | C00P | C00W | 120.9(5) |
| 58 | H00P | C00P | C00W | 119.5    |
| 59 | C00I | C00Q | H00Q | 119.5    |
| 60 | C00I | C00Q | C00V | 121.1(5) |
| 61 | H00Q | C00Q | C00V | 119.4    |
| 62 | C00K | C00R | C00O | 121.4(5) |
| 63 | C00K | C00R | H00R | 119.3    |
| 64 | C00O | C00R | H00R | 119.3    |
| 65 | C00E | C00S | H00S | 119.5    |
| 66 | C00E | C00S | C00Z | 120.9(5) |
| 67 | H00S | C00S | C00Z | 119.6    |
| 68 | C00F | C00T | H00T | 119.2    |
| 69 | C00F | C00T | C010 | 121.5(6) |
| 70 | H00T | C00T | C010 | 119.2    |
| 71 | C00D | C00U | C00L | 120.0(6) |
| 72 | C00D | C00U | H00U | 120      |
| 73 | C00L | C00U | H00U | 120      |
| 74 | C00Q | C00V | C00W | 118.1(6) |
| 75 | C00Q | C00V | C011 | 121.5(5) |
| 76 | C00W | C00V | C011 | 120.4(5) |
| 77 | C00P | C00W | C00V | 121.3(6) |
| 78 | C00P | C00W | H00W | 119.4    |
| 79 | C00V | C00W | H00W | 119.3    |
| 80 | C00M | C00Y | H00B | 109.5    |

|     |      |      |      |          |
|-----|------|------|------|----------|
| 81  | C00M | C00Y | H00F | 109.5    |
| 82  | C00M | C00Y | H00G | 109.5    |
| 83  | H00B | C00Y | H00F | 109.4    |
| 84  | H00B | C00Y | H00G | 109.4    |
| 85  | H00F | C00Y | H00G | 109.5    |
| 86  | C00S | C00Z | C010 | 117.2(6) |
| 87  | C00S | C00Z | C019 | 119.7(6) |
| 88  | C010 | C00Z | C019 | 122.9(6) |
| 89  | C00T | C010 | C00Z | 121.9(6) |
| 90  | C00T | C010 | H010 | 119.1    |
| 91  | C00Z | C010 | H010 | 119      |
| 92  | S001 | C011 | C00V | 108.7(4) |
| 93  | S001 | C011 | H01A | 109.9    |
| 94  | S001 | C011 | H01B | 110      |
| 95  | C00V | C011 | H01A | 109.9    |
| 96  | C00V | C011 | H01B | 110      |
| 97  | H01A | C011 | H01B | 108.3    |
| 98  | S002 | C012 | C00L | 109.2(4) |
| 99  | S002 | C012 | H01C | 109.8    |
| 100 | S002 | C012 | H01D | 109.8    |
| 101 | C00L | C012 | H01C | 109.8    |
| 102 | C00L | C012 | H01D | 109.9    |
| 103 | H01C | C012 | H01D | 108.3    |
| 104 | S002 | C013 | O006 | 121.8(6) |
| 105 | S002 | C013 | C01A | 112.7(6) |
| 106 | O006 | C013 | C01A | 125.4(8) |
| 107 | S003 | C014 | C00O | 112.9(5) |
| 108 | S003 | C014 | H01E | 109      |
| 109 | S003 | C014 | H01F | 109      |
| 110 | C00O | C014 | H01E | 109      |
| 111 | C00O | C014 | H01F | 109      |
| 112 | H01E | C014 | H01F | 107.8    |
| 113 | S004 | C015 | O007 | 121.5(7) |
| 114 | S004 | C015 | C017 | 113.3(6) |
| 115 | O007 | C015 | C017 | 125.0(8) |
| 116 | H01G | C016 | H01H | 109.4    |
| 117 | H01G | C016 | H01I | 109.4    |
| 118 | H01G | C016 | C018 | 109.4    |
| 119 | H01H | C016 | H01I | 109.5    |
| 120 | H01H | C016 | C018 | 109.5    |
| 121 | H01I | C016 | C018 | 109.6    |
| 122 | C015 | C017 | H01J | 109.4    |
| 123 | C015 | C017 | H01K | 109.5    |
| 124 | C015 | C017 | H01L | 109.5    |

|     |      |      |      |          |
|-----|------|------|------|----------|
| 125 | H01J | C017 | H01K | 109.4    |
| 126 | H01J | C017 | H01L | 109.5    |
| 127 | H01K | C017 | H01L | 109.5    |
| 128 | S003 | C018 | O00X | 120.2(7) |
| 129 | S003 | C018 | C016 | 111.2(6) |
| 130 | O00X | C018 | C016 | 128.6(8) |
| 131 | S004 | C019 | C00Z | 114.2(6) |
| 132 | S004 | C019 | H01M | 108.7    |
| 133 | S004 | C019 | H01N | 108.7    |
| 134 | C00Z | C019 | H01M | 108.7    |
| 135 | C00Z | C019 | H01N | 108.7    |
| 136 | H01M | C019 | H01N | 107.7    |
| 137 | C013 | C01A | H01O | 109.4    |
| 138 | C013 | C01A | H01P | 109.4    |
| 139 | C013 | C01A | H01Q | 109.5    |
| 140 | H01O | C01A | H01P | 109.5    |
| 141 | H01O | C01A | H01Q | 109.5    |
| 142 | H01P | C01A | H01Q | 109.5    |

---

## Reference

1. Y. -X. Zhu, Z. -W. Wei, M. Pan, H. -P. Wang, J. -Y. Zhang and C. -Y. Su, *Dalton Trans.*, 2016, **45**, 943.
2. (a) D. F. Eaton, Luminescence Spectroscopy, in Hand-book of Organic Photochemistry, ed. Scaiano. J. C, CRC Press, Boca Raton, **1**, 1989; (b) M. L. Sheepwash, R. H. Mitchell, and C. Bohne, *J. Am. Chem. Soc.*, 2002, **124**, 4693.
3. O. V. Dolomanov, L. J. Bourhis, R. J. Gildea, J. A. K. Howard, H. Puschmann, *J. Appl. Cryst.*, 2009, **42**, 339341.
4. L. Palatinus, G. Chapuis, *J. Appl. Cryst.*, 2007, **40**, 786-790.
5. G. M. Sheldrick, *Acta Cryst.*, 2008, **A64**, 112-122.
